# Supplementary material for: Revisiting the Dissolution of Praziquantel in Biorelevant Media and the Impact of Digestion of Milk on Drug Dissolution
Source: MDPI journal article supplement (doi:10.3390/pharmaceutics14102228), 2022-10-19
Supplement: s1 [file s1]

# Revisiting the Dissolution of Praziquantel in Biorelevant Media and the Impact of Digestion of Milk on Drug Dissolution

Thomas Eason <sup>1</sup>, Gisela Ramirez <sup>1</sup>, Andrew J. Clulow <sup>1,2</sup>, Malinda Salim <sup>1</sup> and Ben J. Boyd <sup>1,3,\*</sup>

<sup>1</sup> Drug Delivery Disposition and Dynamics, Monash Institute of Pharmaceutical Sciences, Monash University (Parkville Campus), 381 Royal Parade, Parkville, VIC 3052, Australia

<sup>2</sup> BioSAXS Beamline, Australian Synchrotron, ANSTO, 800 Blackburn Road, Clayton, VIC 3168, Australia

<sup>3</sup> Department of Pharmacy, University of Copenhagen, Universitetsparken 2, 2100 Copenhagen, Denmark

\* Correspondence: ben.boyd@monash.edu; Tel.: +61-3-99039112; Fax: +61-3-99039583

**Table S1.** Nutritional information of milk and infant formula (IF; based on reconstitution of 14.0 g powder) per 100 mL.

| Nutritional Information | Quantity per 100 mL |        |
|-------------------------|---------------------|--------|
|                         | Milk                | IF     |
| Total fat               | 3.8 g               | 3.8 g  |
| Saturated fat           | 2.5 g               | 2.1 g  |
| Total protein           | 3.4 g               | 1.5 g  |
| Carbohydrate            | 4.8 g               | 7.9 g  |
| Sodium                  | 40 mg               | 36 mg  |
| Calcium                 | 115 mg              | 60 mg  |
| Vitamin A               | 41 µg               | 60 µg  |
| Riboflavin (vitamin B2) | 200 µg              | 112 µg |

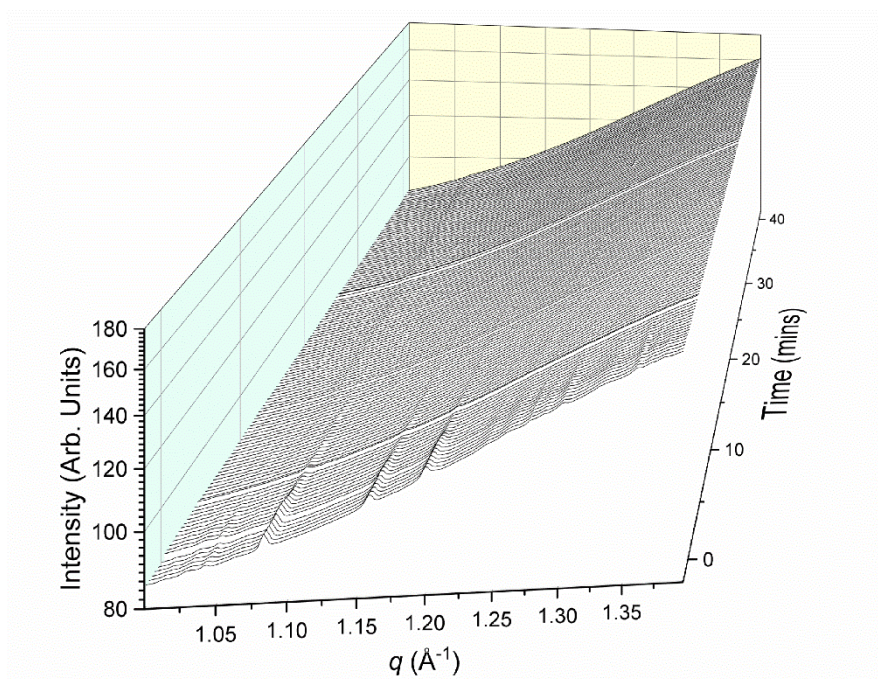

**Figure S1.** X-ray scattering pattern of praziquantel in 3.8% infant formula during dissolution (time < 0 min) and digestion (time > 0 min) showing the progressive decrease in peak intensity that is synchronous across peaks at different positions.
